# Supplementary material
Source: PubMed Central journal article supplement (PMC7263253)
Supplement: mmc1.pdf [file mmc1.pdf]

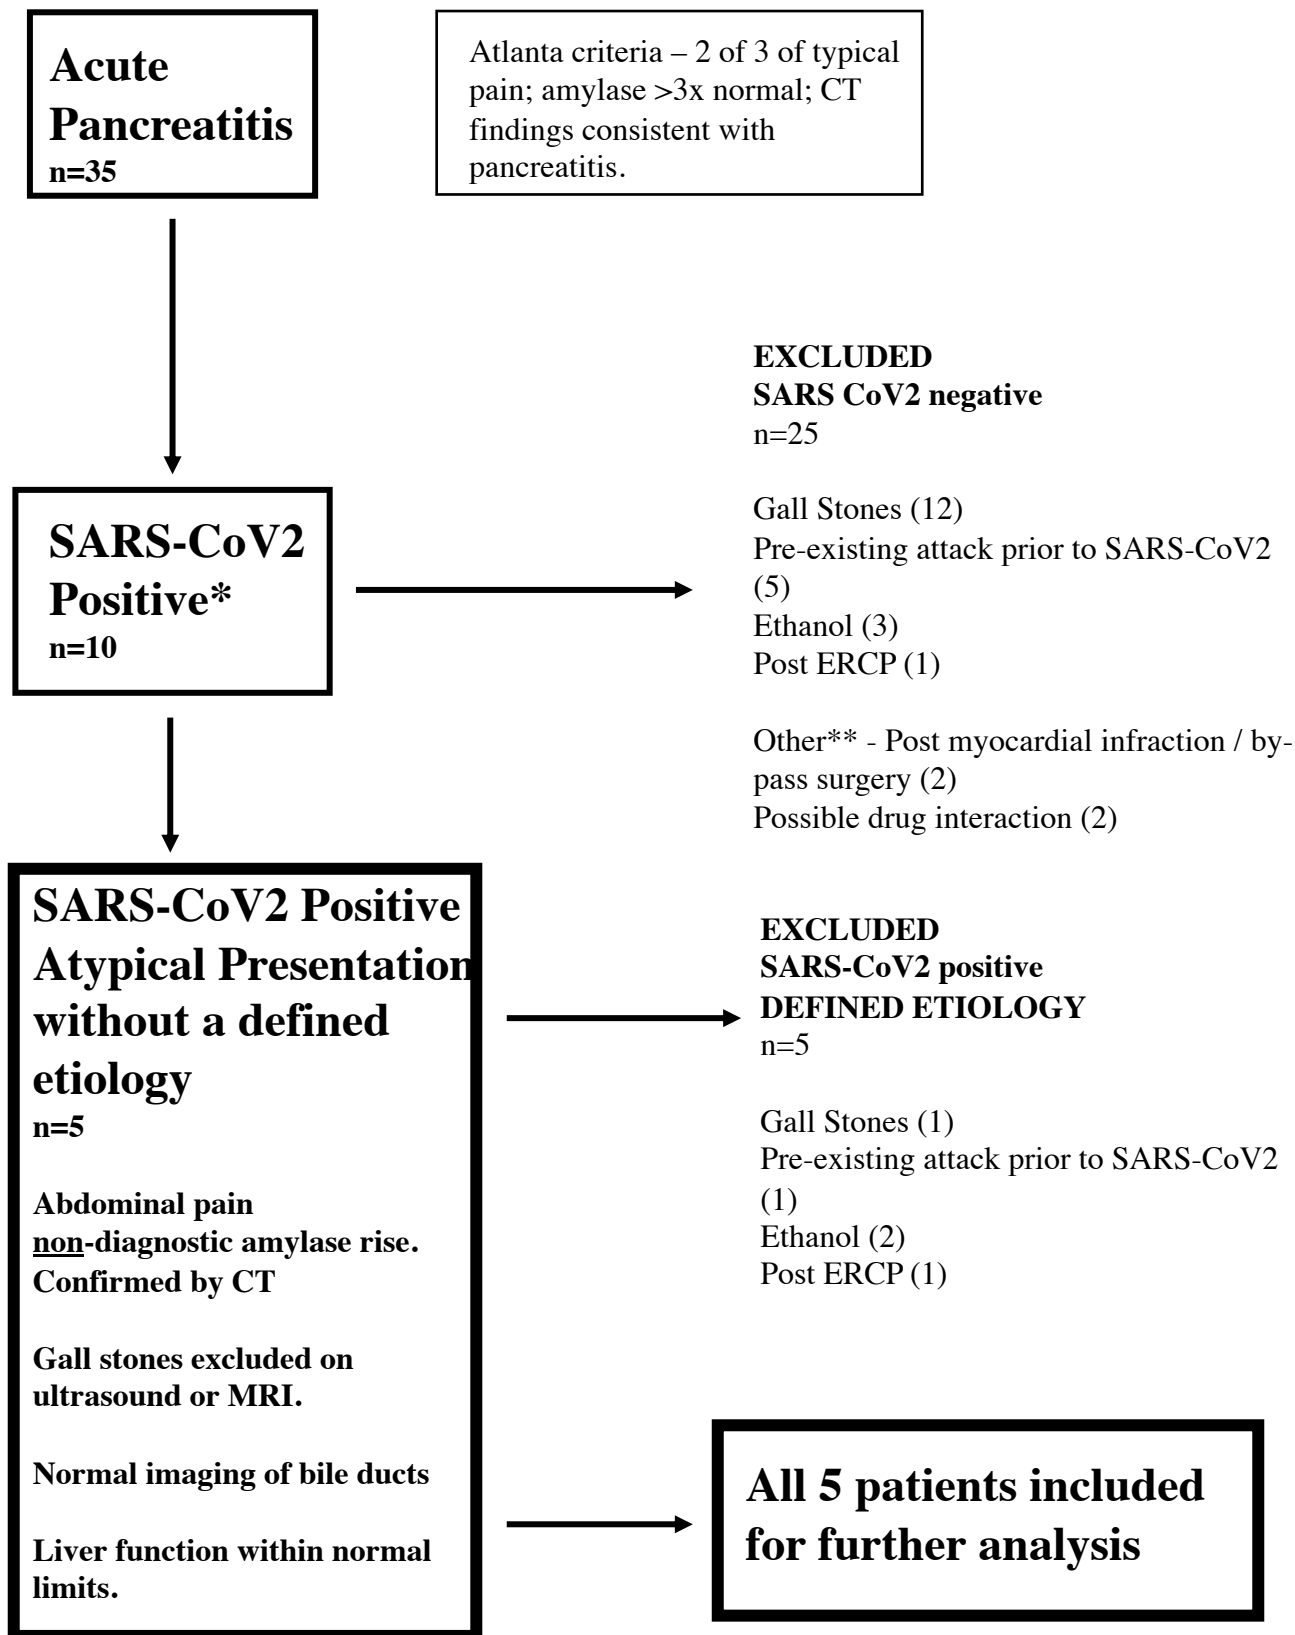

**Figure1. Flow Diagram.** \* A diagnosis was made by either a rapid PCR (VIASURE™) or radiological evidence of SARS-CoV2, the COVID CT score is based on the British Society of Thoracic Imaging criteria where changes are classed as ‘probable’ where there is >70 % confidence of COVID infection<sup>1</sup>. Patients excluded with gall stones had either biliary dilatation, abnormal liver function tests or confirmed ductal stones. Patients excluded with ethanol use had a history of stable chronic alcohol use/abuse, with/without recent binge, with/without pre-existing neurological/liver/pancreas injury. Patients excluded with pre-existing attacks had Recurrent acute or acute-on-chronic pancreatitis with at least one attack prior to Nov 2019. Patients excluded with post ERCP pancreatitis, 1 suspected gallstones, but trawl negative, 1 head of pancreas mass/stent). \*\*Patients negative for SARS-CoV2 and excluded for other reasons had Gallstones excluded on ultrasound or MRI; had no history of significant alcohol intake OR recently reducing alcohol intake in the absence of pre-existing alcohol-related organ damage.

<sup>1</sup>[[https://www.bsti.org.uk/media/resources/files/BSTI\\_COVID-19\\_Radiology\\_Guidance\\_version\\_2\\_16.03.20.pdf](https://www.bsti.org.uk/media/resources/files/BSTI_COVID-19_Radiology_Guidance_version_2_16.03.20.pdf)].
